# Supplementary material for: Fabrication of hydrochar functionalized Fe–Mn binary oxide nanocomposites: characterization and 17β-estradiol removal
Source: Royal Society of Chemistry journal article supplement (doi:10.1039/c7ra06065c), 2017-01-01
Supplement: c7ra06065c1.pdf [file c7ra06065c1.pdf]

**Fabrication of hydrochar functionalized Fe-Mn binary oxide nanocomposites:  
characterization and 17 $\beta$ -estradiol removal**

Qimeng Ning<sup>a,b,c</sup>, Yunguo Liu<sup>a,c,\*</sup>, Shaobo Liu<sup>d,\*</sup>, Guangming Zeng<sup>a,c</sup>, Zhiwei Zeng<sup>a,b,c</sup>, Xiaohua  
Wang<sup>a,b,c</sup>, Jiang Li<sup>a,c</sup>, Luhua Jiang<sup>a,c</sup>, Zulhumar Kare<sup>a,c</sup>

<sup>a</sup> College of Environmental Science and Engineering, Hunan University, Changsha 410082, P. R.  
China

<sup>b</sup> College of Architecture and Urban Planning, Hunan City University, Yiyang 413000, P. R. China.

<sup>c</sup> Key Laboratory of Environmental Biology and Pollution Control (Hunan University), Ministry  
of Education, Changsha 410082, P. R. China

<sup>d</sup> School of Metallurgy and Environment, Central South University, Changsha 410083, P. R. China

---

\*Corresponding Author. Phone: +86 731 88649208. Fax: +86 731 88822829. E-mail: liuyunguo\_hnu@163.com (Y.  
Liu); liushaobo23@163.com (S. Liu).

## Thermodynamic studies

The thermodynamic parameters, such as standard free-energy change ( $\Delta G^\circ$ ), standard enthalpy change ( $\Delta H^\circ$ ) and standard entropy change ( $\Delta S^\circ$ ), were provided from a change in temperature according to following equations:

$$\Delta G^\circ = -RT \ln K^\circ \quad (1)$$

$$\ln K^\circ = \frac{\Delta S^\circ}{R} - \frac{\Delta H^\circ}{RT} \quad (2)$$

where  $R$  (8.314 J/mol K) is universal gas constant and  $T$  (K) is the solution temperature.  $K^\circ$  is the adsorption equilibrium constant, calculated by plotting  $\ln K_d$  ( $K_d = q_e/C_e$ ) versus  $C_e$  and extrapolating  $C_e$  to zero.

The thermodynamic parameters calculated at the data of Fig. S2 on the basis of above equations are exhibited in Table S2. As seen,  $\Delta G^\circ$  values were negative at all temperatures and decreased with decreasing temperature. It revealed that the adsorption process was spontaneous; besides, the lower temperature was favorable to the E2 adsorption onto hydrochar-FMBO.  $\Delta H^\circ$  value was also negative, suggesting that the adsorption process was exothermic. It was the explanation for the decrease in adsorption at higher temperature. In addition, the negative values of  $\Delta S^\circ$  indicated the decrease in the degree of freedom at the solid–liquid interface was due to the immobilization of E2 on the surface of hydrochar-FMBO. Generally, the negative values of  $\Delta G^\circ$ ,  $\Delta H^\circ$  and  $\Delta S^\circ$  demonstrated that the removal process was an enthalpy-driven.

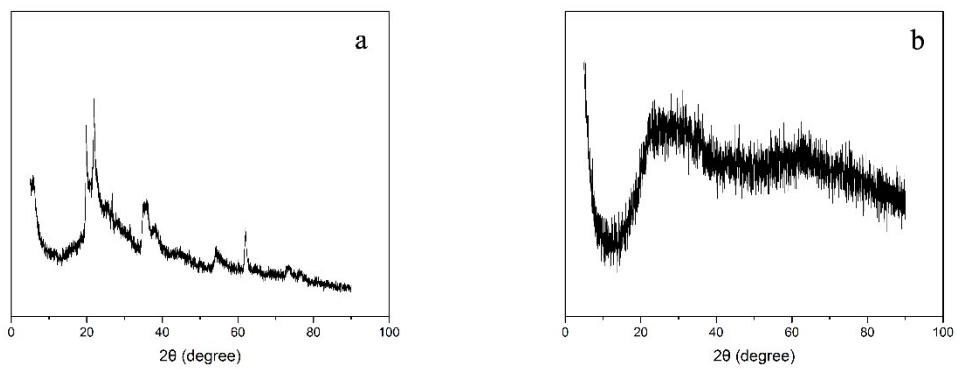

**Fig. S1** XRD patterns for hydrochar (a) and hydrochar-FMBO (b).

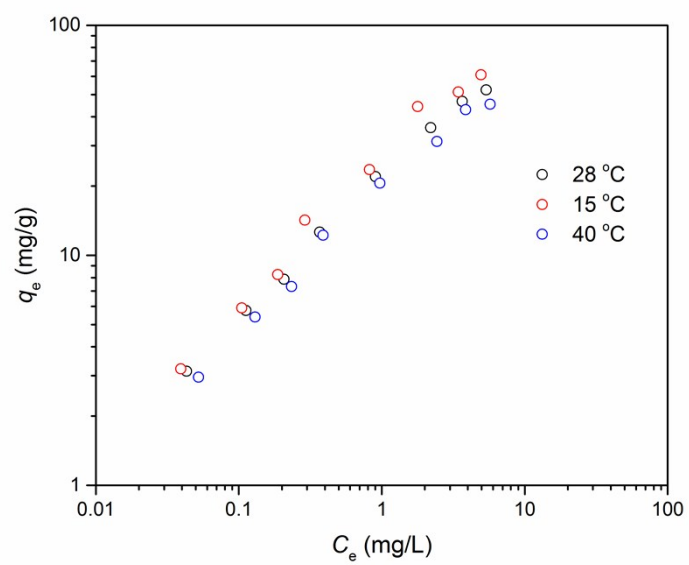

**Fig. S2** Adsorption isotherms of E2 onto hydrochar-FMBO at three different temperatures.

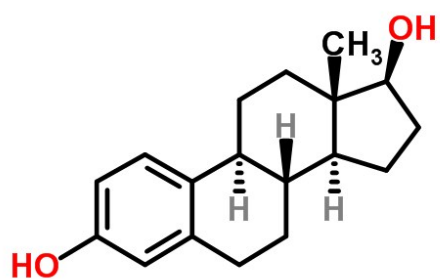

**Fig. S3.** Molecular structure of E2 (obtained from ChemSpider:

<http://www.chemspider.com>).

**Table S1** Parameters calculated from intra-particle diffusion model for E2 adsorption

onto hydrochar-FMBO.

| $C_0$ (mg/L) | $k_{d1}$ (mg/g min <sup>0.5</sup> ) | $L_1$ | $R^2$ | $k_{d2}$ (mg/g min <sup>0.5</sup> ) | $L_2$ | $R^2$ |
|--------------|-------------------------------------|-------|-------|-------------------------------------|-------|-------|
| 6            | 2.11                                | 7.18  | 0.971 | 0.22                                | 38.74 | 0.964 |
| 0.8          | 0.43                                | 0.97  | 0.894 | 0.06                                | 7.10  | 0.970 |

**Table S2** Thermodynamic parameters of E2 adsorption onto hydrochar-FMBO.

| T (K)  | $\Delta G^0$ (kJ/mol) | $\Delta S^0$ (J/K mol) | $\Delta H^0$ (kJ/mol) |
|--------|-----------------------|------------------------|-----------------------|
| 288.15 | -0.95                 |                        |                       |
| 301.15 | -0.96                 | -3.58                  | -1.06                 |
| 313.15 | -0.94                 |                        |                       |
